# Supplementary material for: Effects of high-pressure and transglutaminase, individually and simultaneously applied, on pea and soy protein isolates
Source: Royal Society of Chemistry journal article supplement (doi:10.1039/d3fb00039g), 2023-01-01
Supplement: d3fb00039g1.pdf [file d3fb00039g1.pdf]

## Supplementary Material

For

*“Single and simultaneously combined effects of transglutaminase and high pressure treatments on pea and soy protein isolates”*

By

*Rui P. Queirós, Carlos A. Pinto, Jorge A. Saraiva and José A. Lopes-da-Silva*

## Supplementary Table

**Table S1.** Summary of statistics for the developed models.

|                                |                   | Pea protein isolates |           |                        | Soy protein isolates |           |                        |
|--------------------------------|-------------------|----------------------|-----------|------------------------|----------------------|-----------|------------------------|
|                                |                   | Soluble protein      | SH Groups | Surface Hydrophobicity | Soluble protein      | SH Groups | Surface Hydrophobicity |
| Contribution                   | Model             | 94.76 %              | 91.97 %   | 92.37 %                | 90.23 %              | 84.07 %   | 96.65 %                |
|                                | Linear            | 51.89 %              | 15.14 %   | 27.24 %                | 46.32 %              | 34.43 %   | 41.03 %                |
|                                | <i>P</i>          | 35.28 %              | 7.98 %    | -                      | -                    | 7.08 %    | 27.50 %                |
|                                | <i>t</i>          | 11.30 %              | 5.75 %    | -                      | -                    | -         | 2.64 %                 |
|                                | MTG               | 5.30 %               | 1.41 %    | 27.24 %                | 46.32 %              | 27.16 %   | 10.90 %                |
|                                | Square            | 25.21 %              | 24.89 %   | 30.52 %                | 40.73 %              | -         | 28.41 %                |
|                                | <i>P*P</i>        | -                    | 21.34 %   | -                      | 1.39 %               | -         | 4.92 %                 |
|                                | <i>t*t</i>        | 17.54 %              | -         | 6.62 %                 | 30.64 %              | -         | -                      |
|                                | MTG*MTG           | 7.68 %               | 3.56 %    | 23.90 %                | 8.70 %               | -         | 23.49 %                |
|                                | 2-Way Interaction | 17.66 %              | 51.93 %   | 34.61 %                | 3.18 %               | 49.64 %   | 27.22 %                |
|                                | <i>P*t</i>        | 3.80 %               | 27.70 %   | 3.61 %                 | 3.18 %               | 24.77 %   | 27.22 %                |
|                                | <i>P*MTG</i>      | 13.86 %              | 24.24 %   | 15.64 %                | -                    | 24.86 %   | -                      |
|                                | <i>t*MTG</i>      | -                    | -         | 15.36 %                | -                    | -         | -                      |
|                                | Error             | 5.24 %               | 8.03 %    | 7.63 %                 | 9.77 %               | 15.93 %   | 3.35 %                 |
|                                | Lack-of-fit       | 0.61 %               | 1.67 %    | 1.71 %                 | 2.20 %               | 3.34 %    | 0.75 %                 |
|                                | Pure Error        | 4.63 %               | 6.36 %    | 5.93 %                 | 7.58 %               | 12.59 %   | 2.60 %                 |
|                                | Model summary     | p-value              | < 0.001   | < 0.001                | < 0.001              | < 0.001   | < 0.001                |
| R <sup>2</sup>                 |                   | 0.948                | 0.920     | 0.924                  | 0.902                | 0.841     | 0.967                  |
| Adjusted R <sup>2</sup>        |                   | 0.938                | 0.905     | 0.907                  | 0.884                | 0.820     | 0.961                  |
| Predicted R <sup>2</sup>       |                   | 0.920                | 0.877     | 0.877                  | 0.851                | 0.779     | 0.953                  |
| p-value <sub>Lack-of-fit</sub> |                   | 0.527                | 0.168     | 0.080                  | 0.130                | 0.325     | 0.198                  |

*P* = pressure (MPa); *t* = holding time (min); MTG = concentration of transglutaminase (U/g protein).

## Supplementary Figures

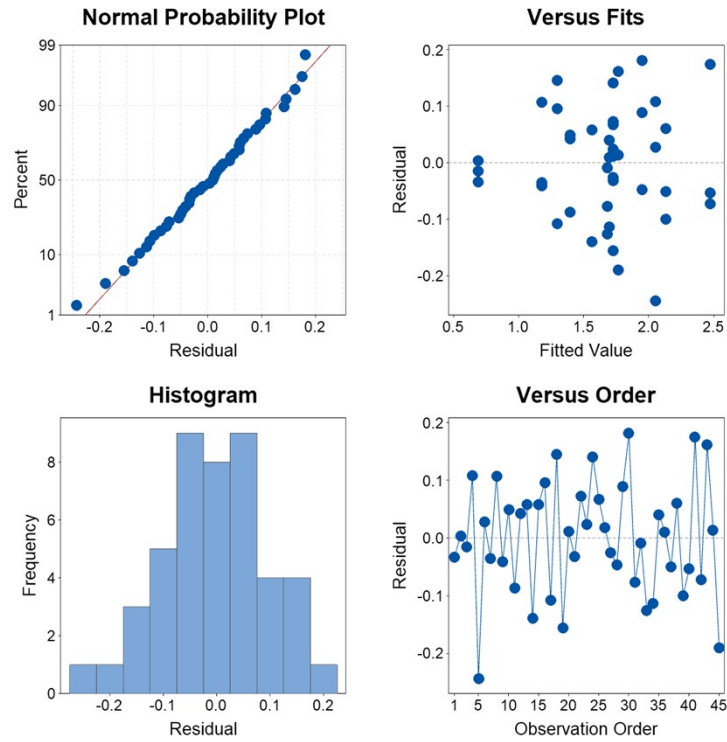

Figure S1. Residual plots of the regression model obtained for the solubility of pea protein isolate.

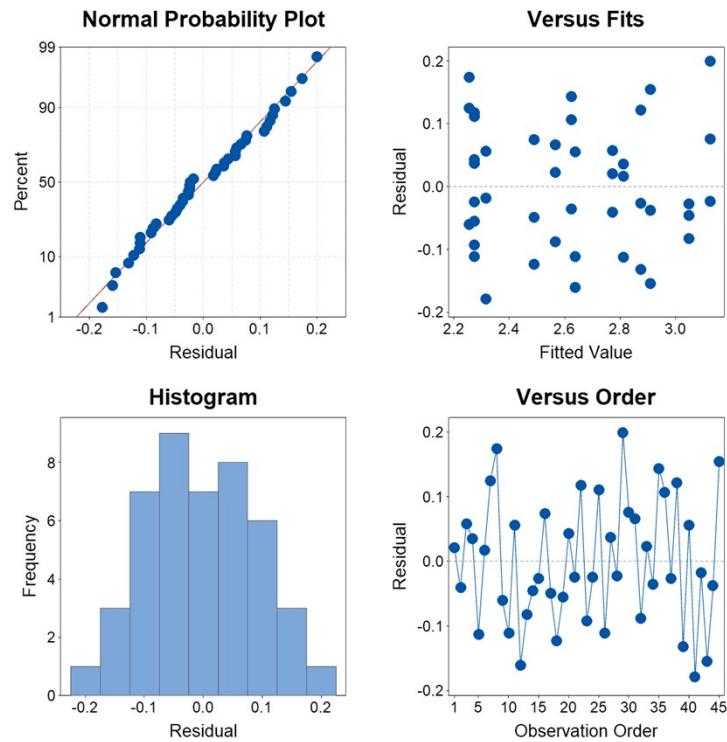

Figure S2. Residual plots of the regression model obtained for the solubility of soy protein isolate.

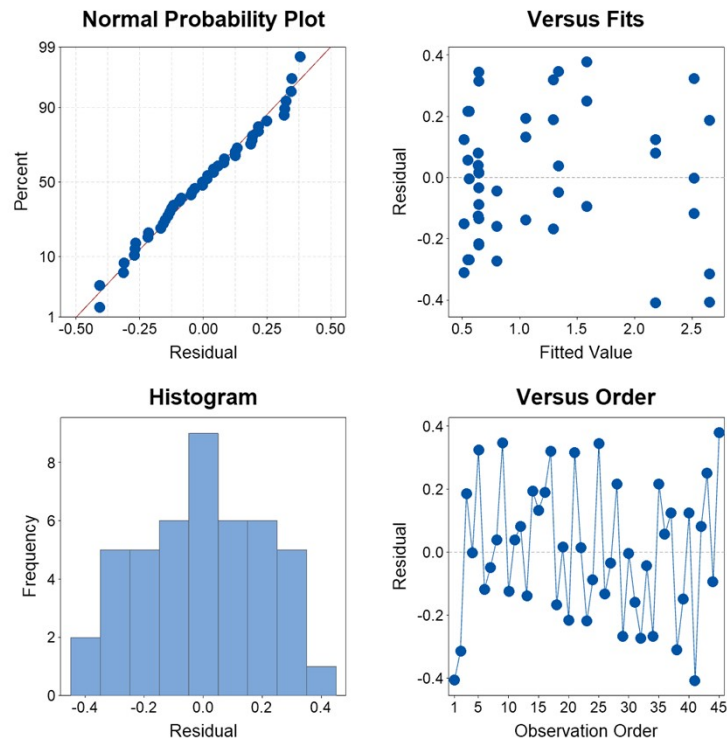

**Figure S3.** Residual plots of the regression model obtained for the content of free sulphydryl groups of pea protein isolate.

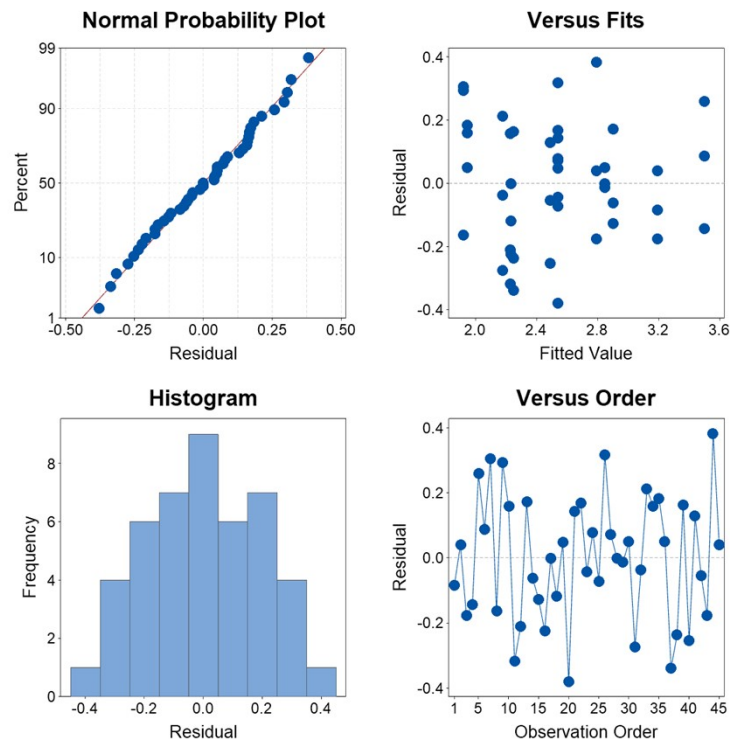

**Figure S4.** Residual plots of the regression model obtained for the content of free sulphydryl groups of soy protein isolate.

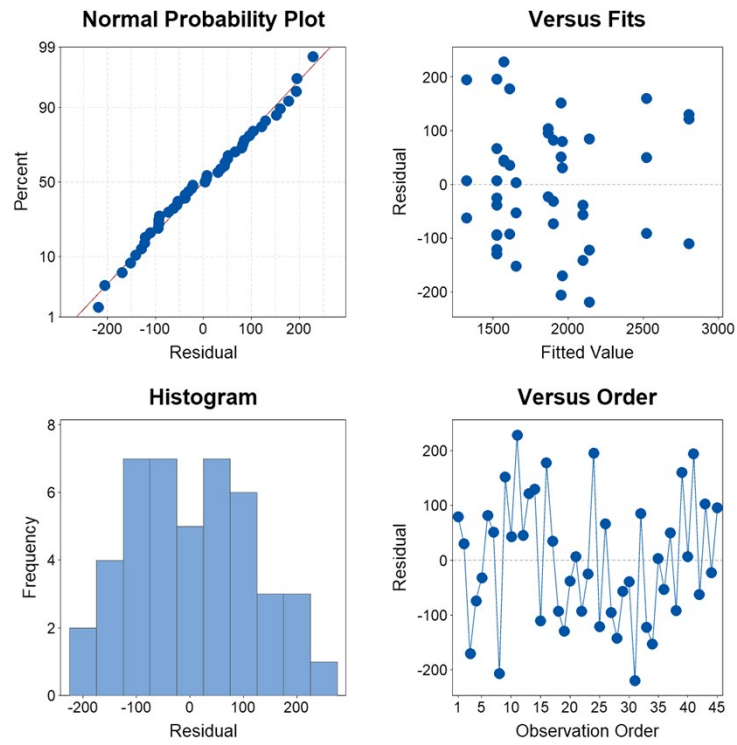

**Figure S5.** Residual plots of the regression model obtained for the surface hydrophobicity of pea protein isolate.

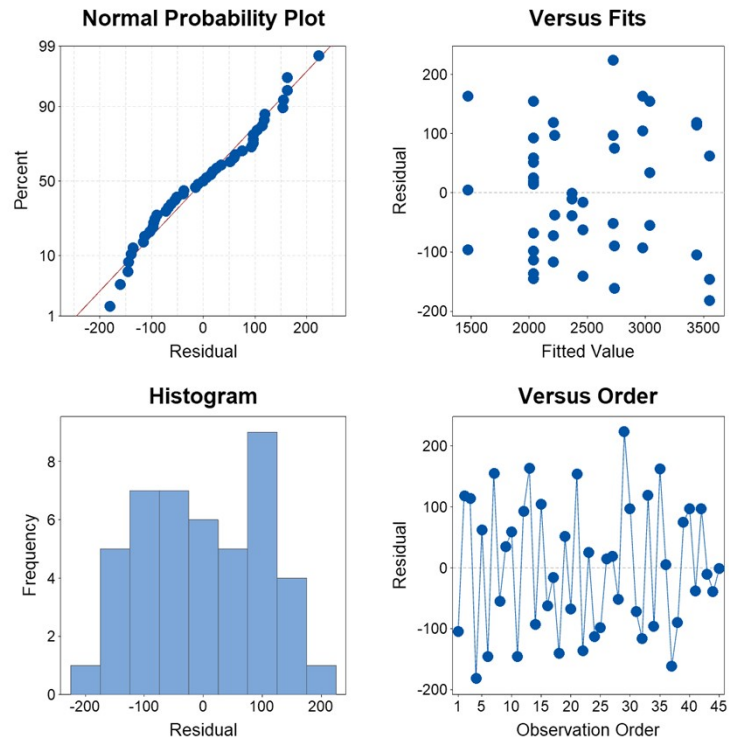

**Figure S6.** Residual plots of the regression model obtained for the surface hydrophobicity of soy protein isolate.
